# Supplementary material for: Sex-stratified Genome-wide Association Studies Including 270,000 Individuals Show Sexual Dimorphism in Genetic Loci for Anthropometric Traits
Source: PLoS Genet. 2013 Jun 6;9(6):e1003500. doi: 10.1371/journal.pgen.1003500 (PMC3674993; doi:10.1371/journal.pgen.1003500)
Supplement: Table S1 — List of studies including sample sizes. (XLS) [file pgen.1003500.s006.xls]

## Sheet: Sheet1
	Hip		WC		WHR		HEIGHT		BMI		WEIGHT
	nmen	nwomen	nmen	nwomen	nmen	nwomen	nmen	nwomen	nmen	nwomen	nmen	nwomen
Discovery Stage:
ADVANCE Cases	.	.	114	160	.	.	114	161	114	161	114	161
ADVANCE Controls	.	.	128	179	.	.	128	181	128	181	128	182
AGES Reykjavik	.	.	1351	1865	.	.	1352	1867	1351	1856	1351	1856
Amish	465	435	465	435	465	435	470	437	468	437	468	437
ARIC	3821	4283	3821	4283	3821	4283	3823	4287	3822	4286	3822	4286
B58C-T1DGC	1198	1292	1198	1292	1198	1292	1261	1330	1259	1328	1259	1328
B58C-WTCCC	700	722	700	722	700	722	741	738	741	738	741	738
BRIGHT	667	982	668	984	667	982	719	1087	719	1087	719	1087
CAD-WTCCC	.	.	.	.	.	.	1491	388	1489	387	1489	387
CAPS1 Cases	.	.	.	.	.	.	489	.	484	.	485	.
CAPS1 Controls	.	.	.	.	.	.	491	.	483	.	485	.
CAPS2 Cases	.	.	.	.	.	.	1483	.	1423	.	1424	.
CAPS2 Controls	.	.	.	.	.	.	519	.	500	.	504	.
CHS	1274	1943	1274	1944	1274	1943	1277	1955	1276	1952	1276	1952
CoLaus	2544	2861	2546	2862	2544	2861	2547	2862	2547	2861	2547	2861
DECODE	2610	3273	2610	3273	2610	3273	9213	17586	9213	17586	9213	17586
DGI Cases	509	449	509	449	509	449	687	630	688	629	688	629
DGI Controls	241	228	241	228	241	228	553	537	553	535	553	535
EGCUT	195	228	195	228	195	228	697	720	697	720	697	720
EPIC-Obesity Study	1130	1284	1130	1284	1130	1284	1621	1931	1131	1284	1131	1284
ERF (EUROSPAN)	890	1170	890	1170	890	1170	890	1170	890	1170	890	1170
Fenland	615	787	615	787	615	787	615	787	615	787	615	787
FamHS Cases	208	233	208	233	208	233	208	233	208	233	208	233
FamHS Controls	207	207	207	207	207	207	208	207	208	207	208	207
FRAM	1562	1715	1562	1715	1562	1715	3700	4389	3706	4388	3706	4388
FTC	.	120	.	120	.	120	.	125	.	125	.	125
FUSION Cases	620	464	620	465	620	464	617	465	623	469	623	469
FUSION Controls	571	598	571	598	571	598	569	598	572	599	572	599
GENMETS Cases	425	423	425	423	425	423	410	414	425	432	410	414
GENMETS Controls	401	423	401	423	401	423	401	422	401	423	401	422
GerMiFSI	.	.	.	.	.	.	394	206	394	206	394	206
GerMiFSII	.	.	.	.	.	.	901	223	901	223	901	223
KORAS3	812	826	812	827	812	826	813	830	813	829	813	829
KORAS4	883	929	883	929	883	929	883	928	883	928	883	929
MICROS	118	175	118	175	112	169	467	612	475	622	468	612
MIGEN	.	.	.	.	.	.	1622	1030	1619	1028	1623	1028
NBS-WTCCC	.	.	.	.	.	.	696	745	694	743	694	743
NFBC1966	2246	2245	2246	2245	2246	2245	2250	2249	2250	2247	2250	2247
NHS	.	1632	.	1632	.	1632	.	2265	.	2265	.	2265
NSPHS	307	339	.	.	.	.	308	344	307	340	307	342
NTRNESDA	1206	2303	1206	2303	1206	2303	1211	2311	1210	2306	1210	2306
ORCADES	324	371	324	371	324	371	324	371	332	384	324	371
PLCO	.	.	.	.	.	.	2244	.	2238	.	2238	.
PROCARDIS	612	346	612	346	612	346	1700	612	1700	612	1700	612
RS-I	2266	3202	2266	3205	2266	3202	2372	3375	2372	3372	2375	3383
RUNMC	.	.	.	.	.	.	1777	1096	1777	1096	1777	1096
SARDINIA	1886	2415	1886	2416	1886	2415	1883	2415	1885	2416	1883	2415
SASBAC Cases	.	.	.	.	.	.	.	794	.	793	.	794
SASBAC Controls	.	.	.	.	.	.	.	758	.	755	.	760
SEARCH / UKOPS	.	.	.	.	.	.	.	1592	.	1556	.	1581
SHIP	2019	2073	2019	2073	2019	2073	2019	2073	2019	2073	2019	2073
T2D_WTCCC	1085	786	1085	786	1085	786	1105	798	1105	798	1105	798
TwinsUK	.	1096	.	1096	.	1094	.	1479	.	1477	.	1477
VIS	325	458	325	459	325	458	325	459	328	467	325	445
Follow-Up Stage - InSilico:
FamHS	1027	1194	1027	1194	1027	1194	1028	1195	1028	1195	.	.
BSN	537	748	537	749	536	748	558	770	558	769	.	.
Corogene Cases	1015	881	1015	881	1015	881	1005	880	1005	880	.	.
Corogene Controls	.	.	.	.	.	.	1128	549	1127	549	.	.
EGCUT	358	357	358	357	358	357	351	349	358	357	.	.
FINGEST	.	.	.	.	.	.	756	206	750	204	.	.
GOOD	938	.	938	.	938	.	938	.	938	.	.	.
HBCS	735	988	735	989	735	988	736	990	736	990	.	.
Hypergenes Cases	170	152	170	152	170	152	1072	538	1072	538	.	.
Hypergenes Controls	120	146	120	146	120	146	998	684	998	684	.	.
Lifelines	1373	1993	1373	1993	1373	1993	1373	1994	1373	1994	.	.
MGS	.	.	.	.	.	.	1247	1350	1247	1350	.	.
PLCO2 Cases	.	.	.	.	.	.	2043	934	2041	933	.	.
PLCO2 Controls	.	.	.	.	.	.	649	544	645	544	.	.
PREVEND	1964	1873	1964	1873	1964	1873	1966	1872	1966	1871	.	.
QIMR	.	.	.	.	.	.	1470	2157	1470	2157	.	.
RS2	877	1035	877	1035	877	1035	876	1035	876	1035	.	.
RS3	842	1085	842	1085	842	1085	877	1129	877	1129	.	.
Sorbs	361	515	363	516	361	515	361	515	361	515	.	.
WGHS	.	20538	.	20566	.	20529	.	23099	.	.	.	.
YFS	907	1075	907	1075	907	1075	911	1084	908	1081	.	.
Follow-Up Stage - MetaboChip:
ADVANCE-CAD Cases	.	.	678	222	.	.	678	222	678	222	678	222
ADVANCE-CAD Controls	.	.	421	247	.	.	421	247	421	247	421	247
AMCPAS Cases	368	122	.	.	.	.	368	122	368	122	368	122
B58C	1231	897	1232	897	1231	897	1234	901	1232	902	1232	902
BHS Cases	79	40	80	40	79	40	83	42	82	42	82	42
BHS Controls	85	51	86	51	85	51	87	51	87	51	87	51
CARDIOGENICS Cases	328	51	.	.	.	.	328	51	328	51	328	51
CARDIOGENICS Controls	148	227	.	.	.	.	148	227	148	227	148	227
D2D2007.DPS.DRSEXTRA.FUSIONS2.METSIM	2151	757	2150	757	2150	757	2152	759	2152	759	2152	759
Cases
D2D2007.DPS.DRSEXTRA.FUSIONS2.METSIM	3669	2957	3669	2955	3669	2954	3672	2963	3672	2963	3672	2963
Controls
DILGOM	1769	2098	1765	2098	1763	2092	1775	2114	1769	2115	1769	2115
EAS	353	378	.	.	.	.	353	378	353	378	352	377
EGCUT CAD Cases	346	354	346	354	346	354	346	354	346	354	346	354
EGCUT Controls	340	600	340	600	340	600	341	601	341	601	341	601
EGCUT DB Cases	272	417	272	417	272	417	355	613	355	613	355	613
Ely	736	852	736	853	735	852	744	855	744	855	744	856
EPIC Cases	432	295	432	295	432	295	432	294	432	291	432	292
EPIC Controls	410	549	411	550	410	549	410	552	410	551	411	551
Fenland	1485	1698	1485	1698	1484	1698	1486	1698	1486	1698	1486	1698
GLACIER	2381	3666	874	1445	.	.	2381	3666	2381	3666	2381	3666
GO-DARTS Cases	1926	1347	1750	1215	.	.	1926	1347	1922	1345	1923	1346
GO-DARTS Controls	1918	1789	1917	1787	.	.	1918	1789	1918	1788	1918	1788
HNR	2262	2256	2262	2256	2262	2256	2262	2256	2262	2256	2262	2256
HUNT.TROMSO Cases	492	470	492	470	492	470	651	637	651	636	651	636
HUNT.TROMSO Controls	566	546	566	547	566	546	749	718	748	717	748	718
IMPROVE	1663	1775	1663	1775	1663	1775	1650	1776	1666	1783	.	.
KORAS3	603	660	603	660	603	660	603	671	599	659	599	659
KORAS4	585	624	585	624	585	624	585	632	582	624	582	624
LURIC Cases	1652	567	1652	567	1652	567	1678	573	1678	574	1678	574
LURIC Controls	327	310	327	310	327	310	330	315	330	315	330	315
MORGAM Cases	984	222	983	222	983	222	1707	246	1707	246	1708	246
MORGAM Controls	1084	287	1084	287	1084	287	2094	319	2095	319	2095	320
NSHD	463	519	463	519	463	518	464	520	464	515	464	516
PIVUS	485	483	485	483	485	483	490	488	490	488	490	488
SCARFSHEEP Cases	886	309	886	310	893	311	893	311	882	310	716	259
SCARFSHEEP Controls	1171	510	1173	512	1181	514	1181	514	1177	509	944	433
STR	563	778	563	780	563	778	808	1377	838	1378	.	.
THISEAS Cases	423	78	423	78	423	78	423	78	423	78	423	78
THISEAS Controls	416	530	416	530	416	530	416	530	416	530	416	530
ULSAM	1095	.	1095	.	1095	.	1112	.	1112	.	1116	.
Whitehall	1700	535	1700	536	1700	535	1699	535	1699	535	1700	536
