# Supplementary material for: Sex-stratified Genome-wide Association Studies Including 270,000 Individuals Show Sexual Dimorphism in Genetic Loci for Anthropometric Traits
Source: PLoS Genet. 2013 Jun 6;9(6):e1003500. doi: 10.1371/journal.pgen.1003500 (PMC3674993; doi:10.1371/journal.pgen.1003500)
Supplement: Table S3 — Study-specific designs and references. (follow-up stage only). (XLS) [file pgen.1003500.s008.xls]

## Sheet: Sheet1
Study				Sample QC
Short name	Full name	Design	Total Sample size (N)	Call rate*	Other exclusions	Samples in analyses (N)	Anthropometric assessment method	References
Follow-Up Stage - Insilico:
LifeLines	LifeLines	Population-based	3900	≥ 95% [exclude if <95%]	1) non-Caucasian (Principle Components Analysis); 2) related individuals (pi-hat > 0.4); 3) unexpected duplicates; 4) gender mismatch	3367	measured	1
PREVEND	Prevention of Renal and Vascular Endstage Disease	Population-based	3920	≥95%	1) ethnic outliers; 2) related individuals and duplicates; 3) missing phenotype	3622	measured	2
QIMR	Twin study at Queensland Instutite of Medical Rearch	Population-based	11930	≥ 95%	1) age < 18; 2) ethnic outliers; 3) related individuals and duplicates; 4) Missing body weight and height	3627	measured or self-reported	3
PLCO2 controls	Prostate, Lung, Colorectal, and Ovarian Cancer Screening Trial	Population-based case-control	1216	>98%	1) sex discordance with genetic data; 2) heterozygosity; 3) ancestry outliers; 4) related individuals and duplicates; 5) missing phenotype data	1193	self-report	4
PLCO2 cases	Prostate, Lung, Colorectal, and Ovarian Cancer Screening Trial	Population-based case-control	3003	>98%	1) sex discordance with genetic data; 2) heterozygosity; 3) ancestry outliers; 4) related individuals and duplicates; 5) missing phenotype data	2976	self-report	4
Follow-Up Stage - MetaboChip:
ADVANCE-CAD cases	Atherosclerotic Disease, VAscular FuNction, & GenetiC Epidemiology study	Population-based case control study of CAD	974	≥ 95%	1) sex discrepancies	663	measured	5-8
ADVANCE-CAD controls	Atherosclerotic Disease, VAscular FuNction, & GenetiC Epidemiology study	Population-based case control study of CAD	705	≥ 95%	1) sex discrepancies	895	measured	5-8
AMC-PAS	Academic Medical Centre Amsterdam Premature Atherosclerosis Study	CAD cases	706	0.97	1) heterozygosity; 2) ethnic outliers; 3) duplicates; 4) missing phenotypes; 5) call rate< 0.95	490	measured	9
B58C nonGWAS	1958 British Birth Cohort	Population-based	2359	For SNPs with MAF >=5%: >=95%; For SNPs with >=1% MAF<5%: >=99%	1) MAF>=1%; 2) genotype clustering; 3) call rate; 4) HWE; 5) MI of alleles; 6) concordance rate; 7) correct SNP mapping	2211	measured	10-13
BHS nonGWAS metabochip	Busselton Health Study	Population-based	270	≥99%	1) Relatedness	267	measured	14
CARDIOGENICS	CARDIOGENICS	CAD case-control	806	0.98	1) heterozygosity; 2) ethnic outliers; 3) duplicates; 4) missing phenotypes; 5) call rate< 0.95	754	measured	15
D2D2007 cases	FIN-D2D study	Population-based	457	≥ 98.15%	1) Missing BMI, age, age<18, or is not T2D; 2) Gender discrepancy or anomaly; 3) Unexplained duplicate sample	457	measured	16
D2D2007 controls	FIN-D2D study	Population-based	2231	≥ 98.15%	1) Missing BMI, age, age<18., or has diabetes; 2) Gender discrepancy or anomaly; 3) Unexplained duplicate sample	2231	measured	16
DILGOM	Dietary, life style, and genetic determinants of obesity and metabolic syndrome	Population-based	3997	≥ 95%	1) heterozygosity <23.9% or >27.6%; 2) ethnic outliers; 3) related individuals and duplicates	3938	measured	17,18
DPS cases	Diabetes Prevention Study	Population-based	89	≥ 98.15%	1) Missing BMI, age, age<18, or is not T2D; 2) Gender discrepancy or anomaly; 3) Unexplained duplicate sample	89	measured	19
DPS controls	Diabetes Prevention Study	Population-based	383	≥ 98.15%	1) Missing BMI, age, age<18., or has diabetes; 2) Gender discrepancy or anomaly; 3) Unexplained duplicate sample	383	measured	19
DR'S EXTRA cases	DR'S EXTRA	Population-based	111	≥ 98.15%	1) Missing BMI, age, age<18, or is not T2D; 2) Gender discrepancy or anomaly; 3) Unexplained duplicate sample	121	measured	20
DR'S EXTRA controls	DR'S EXTRA	Population-based	1174	≥ 98.15%	1) Missing BMI, age, age<18., or has diabetes; 2) Gender discrepancy or anomaly; 3) Unexplained duplicate sample	1174	measured	20
EAS	Edinburgh Artery Study	Population-based	750	≥ 95%	1) Missing body weight and height	729	Measured	21
EGCUT metabochip CAD cases	Estonian Genome Center of University of Tartu - Cardiovascular Disease cases	Case-Controls	700	≥ 84.6%	1) Missing body weight and height; 2) Cryptic relatedness		measured	22
EGCUT metabochip controls	Estonian Genome Center of University of Tartu - Controls	Case-Controls	942	≥ 84.6%	1) Missing body weight and height; 2) Cryptic relatedness		measured	22
EGCUT metabochip DB cases	Estonian Genome Center of University of Tartu - Type 2 Diabetes cases	Case-Controls	968	≥ 84.6%	1) Missing body weight and height; 2) Cryptic relatedness		measured	22
ELY	Ely Study	Population-based	1625	≥ 95%	1) Missing body weight and height; 2) Heterozygosity; 3) gender check	1600	measured	23
EPIC cases	EPIC (European Prospective Investigation into Cancer) Norfolk Cohort, DM cases	Population-based	735	≥ 95%	1) Missing body weight and height, or case-control status; 2) Heterozygosity; 3) gender check	727	measured	24
EPIC controls	EPIC (European Prospective Investigation into Cancer) Norfolk Cohort, non-DM controls	Population-based	978	≥ 95%	1) Missing body weight and height, or case-control status; 2) Heterozygosity; 3) gender check	963	measured	24
Fenland	Fenland Study	Population-based	3251	≥ 95%	1) Missing body weight and height; 2) Heterozygosity; 3) gender check	3186	measured	25
FUSION stage 2 cases	FUSION stage 2	case-control	1039	≥ 98.15%	1) Missing BMI, age, age<18, or is not T2D; 2) Gender discrepancy or anomaly; 3) Unexplained duplicate sample	1039	measured	26
FUSION stage 2 controls	FUSION stage 2	case-control	1890	≥ 98.15%	1) Missing BMI, age, age<18., or has diabetes; 2) Gender discrepancy or anomaly; 3) Unexplained duplicate sample	1890	measured	26
GLACIER	Gene x Lifestyle interactions And Complex traits Involved in Elevated disease Risk	Prospective cohort study	6311	≥ 95%	1) Missing phenotype; 2) Duplicates; 3) Call rate; 4) Heterozygosoty; 5) Gender fails	6047	measured	27,28
GO-DARTS cases	GO-DARTS cases	Population-based	3582	For SNPs with MAF >=5% : >=95%; For SNPs with >=1% MAF<5%: >=99%	1) MAF>=1%; 2) genotype clustering; 3) call rate; 4) HWE; 5) MI of alleles; 6) concordance rate; 7) correct SNP mapping	3313	measured	29
GO-DARTS controls	GO-DARTS controls	Population-based	3962	For SNPs with MAF >=5% : >=95%; For SNPs with >=1% MAF<5%: >=99%	1) MAF>=1%; 2) genotype clustering; 3) call rate; 4) HWE; 5) MI of alleles; 6) concordance rate; 7) correct SNP mapping	3709	measured	29
Heinz Nixdorf Recall Study	Heinz Nixdorf Recall Study	Population-based	4570	≥ 97%	1) heterozygosity <21% or >26%; 2) ethnic outliers = 15; 3) related individuals and duplicates = 37; 4) Missing body weight = 26 and height = 18	4518		30
HUNT cases	HUNT2	Population-based, although T2D case-control samples selected for metabochip typing	578	≥ 98.15%	1) Missing BMI, age, age<18, or is not T2D; 2) Gender discrepancy or anomaly; 3) Unexplained duplicate sample	578	measured	31
HUNT controls	HUNT2	Population-based, although T2D case-control samples selected for metabochip typing	756	≥ 98.15%	1) Missing BMI, age, age<18, or is T2D; 2) Gender discrepancy or anomaly; 3) Unexplained duplicate sample	756	measured	31
IMPROVE		Population-based	3426	≥ 95%	1) ambiguous sex; 2) cryptic relatedness; 3) non-european descent	3426	measured	32
KORA S3	Cooperative Health Research in the Region of Augsburg (third survey), KOoperative Gesundheitsforschung in der Region Augsburg (dritte Studie)	Population-based	3113	0.93	none	3113	measured	33
KORA S4	Cooperative Health Research in the Region of Augsburg (forth survey), KOoperative Gesundheitsforschung in der Region Augsburg (vierte Studie)	Population-based	3028	0.93	none	3028	measured	33
LURIC cases	Ludwigshafen Risk and Cardiovascular Health Study	case-control	2281	≥ 95%	1) Gender ambiguity; 2) Missing hip and waist measurement, age < 18	2251	measured	34
LURIC controls	Ludwigshafen Risk and Cardiovascular Health Study	case-control	648	≥ 95%	1) Gender ambiguity; 2) Missing hip and waist measurement, age < 18	644	measured	34
METSIM cases	Metabolic Syndrome In Men	Population-based, although T2D case-control samples selected for metabochip typing	1214	≥ 98.15%	1) Missing BMI, age, age<18, or is not T2D; 2) Gender discrepancy or anomaly; 3) Unexplained duplicate sample	1214	measured	35
METSIM controls	Metabolic Syndrome In Men	Population-based, although T2D case-control samples selected for metabochip typing	957	≥ 98.15%	1) Missing BMI, age, age<18, or has diabetes 2) Gender discrepancy or anomaly; 3) Unexplained duplicate sample	957	measured	35
MORGAM	MOnica Risk, Genetics, Archiving and Monograph	Population-based	~2,650	≥ 95%	1) heterozygosity <18.1% or >20.7%; 2) >10.0% discordance with Sequenom genotypes; 3) ethnic outliers; 4) related individuals and duplicates	2528	measured	36-39
MORGAM cases	MOnica Risk, Genetics, Archiving and Monograph	CVD cases from population-based follow-up cohorts. Baseline and incident cases.	~2,150	≥ 95%	1) heterozygosity <18.1% or >20.7%; 2) >10.0% discordance with Sequenom genotypes; 3) ethnic outliers; 4) related individuals and duplicates	2065	measured	36-39
NSHD	MRC National Survey of Health & Development	Birth cohort	5362	≥ 95%	1) Missing body weight and height; 2) Heterozygosity; 3) gender check	988	measured	40,41
PIVUS	Prospective Investigation of the Vasculature in Uppsala Seniors	Population-based	999	≥90%	1) Related individuals and duplicates; 2) Heterozygosity, (F-mean(F))/sd(Z) ≥ 5; 3) Missing all phenotypes	978	measured	42
SCARFSHEEP		case-control	2899	≥ 95%	1) ambiguous sex; 2) cryptic relatedness; 3) non-european descent	3201	measured
STR	Swedish Twin Registry	Population-based	2702	≥90%	1) Heterozygosity, (F-mean(F))/sd(Z) ≥ 5; 2) Missing all phenotypes	2430	measured	43
T2D – WTCCC nonGWAS	Wellcome Trust Case Control Consortium - T2D non GWAS	Population-based	1335	For SNPs with MAF >=5% : >=95%; For SNPs with >=1% MAF<5%: >=99%	1) MAF>=1%; 2) genotype clustering; 3) call rate; 4) HWE; 5) MI of alleles; 6) concordance rate; 7) correct SNP mapping	1077	measured
THISEAS	The Hellenic study of Interactions between Snps and Eating in Atherosclerosis Susceptibility	CAD case-control	1887	0.97	1) heterozygosity; 2) ethnic outliers; 3) duplicates; 4) missing phenotypes; 5) call rate < 0.95	1413	measured	44
Tromsø cases	Tromsø	Population-based, although T2D case-control samples selected for metabochip typing	709	≥ 98.15%	1) Missing BMI, age, age<18, or is not T2D; 2) Gender discrepancy or anomaly; 3) Unexplained duplicate sample	709	measured	45
Tromsø controls	Tromsø	Population-based, although T2D case-control samples selected for metabochip typing	709	≥ 98.15%	1) Missing BMI, age, age<18, or is T2D; 2) Gender discrepancy or anomaly; 3) Unexplained duplicate sample	709	measured	45
ULSAM	Uppsala Longitudinal Study of Adult Men	Population-based	1221	≥90%	1) Related individuals and duplicates; 2) Heterozygosity, (F-mean(F))/sd(Z) ≥ 5; 3) Missing all phenotypes	1116	measured	46
WHITEHALL	The Whitehall II study	Cohort of London-based civil servants	3413	≥ 95%	1) Missing body weight and height; 2) Heterozygosity; 3) gender check	3377	measured	47,48.
