# Supplementary material for: Sex-stratified Genome-wide Association Studies Including 270,000 Individuals Show Sexual Dimorphism in Genetic Loci for Anthropometric Traits
Source: PLoS Genet. 2013 Jun 6;9(6):e1003500. doi: 10.1371/journal.pgen.1003500 (PMC3674993; doi:10.1371/journal.pgen.1003500)
Supplement: Table S5 — Study-specific descriptives. (follow-up stage only). (XLS) [file pgen.1003500.s010.xls]

## Sheet: Sheet1
		Men								Women
Study	Trait	n	mean	SD	median	min	max	correlation with BMI	correlation with height	n	mean	SD	median	min	max	correlation with BMI	correlation with height
Follow-Up Stage - Insilico:
LifeLines	Age (yrs)	1373	56.2	9.6	54	21.9	87.6	0.1	-0.3	1994	54.8	10	52	23.3	89	0.2	-0.3
	BMI (kg/m²)	1373	26.9	3.6	26.4	17	48.9	1	-0.1	1994	26.5	4.6	25.6	15.2	51	1	-0.2
	Weight (kg)	1373	88	13.1	86	53	165	0.8	0.5	1994	74.2	12.9	72	43	135	0.9	0.3
	Height (m)	1373	1.8	0.1	1.8	1.6	2	-0.1	1	1994	167.6	6.3	168	145	189	-0.2	1
	WC (cm)	1373	98.2	10.5	98	71	158	0.8	0.1	1993	89.8	11.9	89	60	139	0.8	0
	Hip (cm)	1373	100.2	7.3	100	78	153	0.7	0.3	1993	102	10.1	101	69	181	0.8	0.1
	WHR	1373	1	0.1	1	0.7	1.3	0.5	-0.1	1993	0.9	0.1	0.9	0.5	1.3	0.4	-0.1
PLCO2 controls	Age (yrs)	649	63.6	5.2	64	55	74	-0.2	-0.1	544	63.6	5.2	64	55	74	-0.1	-0.1
	BMI (kg/m²)	645	27	3.9	26.5	17.2	40.5	1	0	544	26.4	5	25.7	16.7	50.3	1	-0.1
	Weight (kg)	645	86.6	14	83.9	52.2	145.1	0.9	0.5	544	70.3	14.2	68	41.3	149.7	0.9	0.3
	Height (m)	649	1.8	0.1	1.8	1.6	2	0	1	544	1.6	0.1	1.6	1.5	1.9	-0.1	1
	WC (cm)	-	-	-	-	-	-	-	-	-	-	-	-	-	-	-	-
	Hip (cm)	-	-	-	-	-	-	-	-	-	-	-	-	-	-	-	-
	WHR	-	-	-	-	-	-	-	-	-	-	-	-	-	-	-	-
PLCO2 cases	Age (yrs)	2042	64.2	5.1	64	55	74	-0.1	-0.1	934	64	5.3	64	55	74	0	-0.1
	BMI (kg/m²)	2040	27.5	4.2	26.9	15.9	50.2	1	0	933	26.7	5.1	25.9	16.5	52.2	1	-0.1
	Weight (kg)	2040	87.6	14.8	85.3	52.2	176.9	0.9	0.4	933	71	14.5	68	40.8	137.9	0.9	0.3
	Height (m)	2042	1.8	0.1	1.8	1.6	2.1	0	1	934	1.6	0.1	1.6	1.2	1.9	-0.1	1
	WC (cm)	-	-	-	-	-	-	-	-	-	-	-	-	-	-	-	-
	Hip (cm)	-	-	-	-	-	-	-	-	-	-	-	-	-	-	-	-
	WHR	-	-	-	-	-	-	-	-	-	-	-	-	-	-	-	-
PREVEND	Age (yrs)	1870	50.9	12.8	50	28	75	0.2	-0.3	1752	48.2	12	47	28	75	0.3	-0.4
	BMI (kg/m²)	1870	26.4	3.7	26	17.2	44.7	1	-0.2	1752	25.8	4.8	25	17.1	53.7	1	-0.2
	Weight (kg)	1870	85.1	12.5	84	49	146	0.9	0.4	1752	72.3	13.2	70	44.9	144.5	0.9	0.2
	Height (m)	1870	1.8	0.1	1.8	1.6	2.1	-0.2	1	1752	1.7	0.1	1.7	1.5	1.9	-0.2	1
	WC (cm)	1868	94.5	11.2	94	31	141.5	0.8	0	1752	83.3	13	81.5	57	150	0.9	-0.1
	Hip (cm)	1868	100.1	6.7	100	70	128	0.8	0.2	1752	101	10.4	100	68	170	0.9	0
	WHR	1868	0.9	0.1	0.9	0.3	1.4	0.6	-0.2	1752	0.8	0.1	0.8	0.5	1.4	0.4	-0.2
QIMR	Age (yrs)	1470	44.7	16.3	44	18	91	0.3	-0.2	2157	44	15.3	42	18	90	0.3	-0.2
	BMI (kg/m²)	1470	26	3.9	25.6	14.8	60.9	1	-0.1	2157	25	5.1	23.9	14.2	64.5	1	-0.2
	Weight (kg)	1470	82.2	13.2	81	47	180	0.9	0.4	2157	66.6	13.7	64	34	160	0.9	0.2
	Height (m)	1470	1.8	0.1	1.8	1.5	2	-0.1	1	2157	1.6	0.1	1.6	1.3	2	-0.2	1
	WC (cm)	-	-	-	-	-	-	-	-	-	-	-	-	-	-	-	-
	Hip (cm)	-	-	-	-	-	-	-	-	-	-	-	-	-	-	-	-
	WHR	-	-	-	-	-	-	-	-	-	-	-	-	-	-	-	-
Follow-Up Stage - MetaboChip:
ADVANCE-CAD cases	Age (yrs)	675	61.5	8.2	61.2	34	87.5	-0.2	-0.1	220	66.2	6.3	66.4	47.9	80.1	-0.8	-0.2
	BMI (kg/m²)	675	29.1	4.8	28.2	17.8	53.7	1	0	220	29	6.4	28	16.9	66.1	1	-0.2
	Weight (kg)	675	90.3	16	87.9	48.4	164.7	0.9	0.4	220	75.6	16.5	73.4	44.9	149.1	0.9	0.2
	Height (m)	675	1.8	0.1	1.8	1.6	2	0	1	220	1.6	0.1	1.6	1.4	1.8	-0.2	1
	WC (cm)	675	99.9	12	98.4	70.2	148	0.9	0.2	217	89.2	14.1	88.4	59.9	132.3	0.9	0
	Hip (cm)	0	-	-	-	-	-	-	-	0	-	-	-	-	-	-	-
	WHR	0	-	-	-	-	-	-	-	0	-	-	-	-	-	-	-
ADVANCE-CAD controls	Age (yrs)	420	65.8	2.9	65.3	61	72.3	0	0	243	65.7	2.9	65.5	60.6	71.2	-0.1	-0.1
	BMI (kg/m²)	420	28.4	4.5	27.6	19.9	46.6	1	-0.1	243	28	6.2	27	17.4	50.4	1	-0.1
	Weight (kg)	420	87.9	14.9	85.2	59.6	136.4	0.9	0.4	243	73.7	16.5	70.7	44.2	128.2	0.9	0.2
	Height (m)	420	1.8	0.1	1.8	1.6	2	-0.1	1	243	1.6	0.1	1.6	1.4	1.8	-0.1	1
	WC (cm)	419	99.5	12.6	98.5	66.5	154	0.9	0.1	243	85.8	13.4	84.8	58.7	131.6	0.9	0
	Hip (cm)	-	-	-	-	-	-	-	-	0	-	-	-	-	-	-	-
	WHR	-	-	-	-	-	-	-	-	0	-	-	-	-	-	-	-
AMC-PAS	Age (yrs)	368	43.5	5.1	44.5	24	50	-0.1	-0.1	122	42.8	5.6	44	25	50	0.1	-0.1
	BMI (kg/m²)	368	27.1	3.8	26.7	18.5	40.6	1	0.1	122	26.2	5.1	25.3	17.4	41.2	1	-0.1
	Weight (kg)	368	88.1	14.8	86	50	150	0.9	0.5	122	73.1	14.8	70	49	122	0.9	0.3
	Height (m)	368	1.8	0.1	1.8	1.6	2	0.1	1	122	1.7	0.1	1.7	1.5	1.8	-0.1	1
	WC (cm)	-	-	-	-	-	-	-	-	-	-	-	-	-	-	-	-
	Hip (cm)	-	-	-	-	-	-	-	-	-	-	-	-	-	-	-	-
	WHR	-	-	-	-	-	-	-	-	-	-	-	-	-	-	-	-
B58C non GWAS	Age (yrs)	1234	45	0	45	45	45	-	-	902	45	0	45	45	45	-	-
	BMI (kg/m²)	1232	27.8	4.2	27.3	16.5	53.6	1	-0.02	902	26.6	5.3	25.3	17.7	54.3	1	-0.16
	Weight (kg)	1234	85.9	14.8	84.6	-9	158.9	0.89	0.41	902	70.1	14.3	67	42	143.5	0.92	0.23
	Height (m)	1234	1.76	0.07	1.76	1.56	1.98	-0.02	1	902	1.62	0.06	1.63	1.22	1.84	-0.16	1
	WC (cm)	1234	98.1	11.8	97.2	-9	151.2	0.8	0.2	902	83.9	14.3	82.4	-9	133.8	0.76	0.05
	Hip (cm)	1234	105.3	9.1	105.1	-9	152.4	0.64	0.26	902	103.9	13.8	102.4	-9	157.6	0.71	0.1
	WHR	1234	0.9	0.5	0.9	-9	1.2	0.08	0.01	902	0.8	0.7	0.8	-9	1.1	0.02	0.06
BHS nonGWAS metabochip Cases	Age (yrs)	85	70.2	8.6	71.2	53	91.1	-0.1	-0.2	43	70.4	9.6	71.7	42.1	91.6	-0.1	-0.5
	BMI (kg/m²)	82	27.4	3.7	26.5	18	38.7	1	-0.1	42	25.8	3.9	25.2	18.7	37.9	1	0.1
	Weight (kg)	82	82.4	12.3	81.5	59	109	0.9	0.4	42	66.5	11.8	66.7	46	100.6	0.9	0.5
	Height (m)	83	1.7	0.1	1.7	1.6	1.9	-0.1	1	42	1.6	0.1	1.6	1.5	1.8	0.1	1
	WC (cm)	80	99.8	10.5	99.4	69	127	0.9	0.1	40	84.6	10.4	83.4	65.2	119	0.9	0.1
	Hip (cm)	79	102.5	8.4	101.8	84.9	137	0.8	0.1	40	101.1	9.1	99.3	86	136	0.9	0.2
	WHR	79	1	0.1	1	0.8	1.1	0.4	0.1	40	0.8	0.1	0.8	0.7	1	0.4	-0.1
BHS nonGWAS metabochip Controls	Age (yrs)	88	69.6	9	71.6	35.9	87.3	0.1	-0.2	51	70.7	9.9	71.8	41.6	88.1	0	-0.2
	BMI (kg/m²)	87	26.2	3.4	25.6	18	36.4	1	0	51	26.8	5.2	25.5	19.4	44.5	1	0.1
	Weight (kg)	87	77.5	11.7	77	51.4	107.6	0.9	0.5	51	68.6	14.2	66	49.8	107	1	0.4
	Height (m)	87	1.7	0.1	1.7	1.6	1.9	0	1	51	1.6	0.1	1.6	1.5	1.7	0.1	1
	WC (cm)	86	94.4	9.6	94.8	71.5	129.5	0.9	0.2	51	84.9	11.8	81.5	67.2	116	0.9	0.2
	Hip (cm)	85	99	6.6	99.5	82	111.2	0.8	0.4	51	103.9	12.1	100.8	88.8	140.2	0.9	0.2
	WHR	85	0.9	0.1	0.9	0.8	1.1	0.5	-0.1	51	0.8	0.1	0.8	0.7	0.9	0.2	0.1
CARDIOGENICS	Age (yrs)	476	55.7	8.3	56	26	87	0	-0.2	278	54.2	7.6	55	39	79	0.1	-0.1
	BMI (kg/m²)	476	27.7	4.1	27.1	17.1	42.2	1	-0.1	278	26	4.4	25.3	17.7	43.8	1	0
	Weight (kg)	476	86.4	13.8	84	36	133	0.9	0.4	278	70.1	13	68	43	127	0.9	0.4
	Height (m)	476	1.8	0.1	1.8	1.5	2	-0.1	1	278	1.6	0.1	1.7	1.5	1.8	0	1
	WC (cm)	-	-	-	-	-	-	-	-	-	-	-	-	-	-	-	-
	Hip (cm)	-	-	-	-	-	-	-	-	-	-	-	-	-	-	-	-
	WHR	-	-	-	-	-	-	-	-	-	-	-	-	-	-	-	-
D2D2007 cases	Age (yrs)	270	63.1	7.8	65	45	74	-0.1	-0.2	187	63.7	7.1	65	45	74	-0.1	-0.3
	BMI (kg/m²)	270	29.9	5	29.1	20.2	48.3	1	0	187	31.4	6.1	30.7	19.3	52.7	1	0.1
	Weight (kg)	270	92.3	16.5	90.4	57.7	150	0.9	0.4	187	81.7	16.7	79.1	49.9	137.4	0.9	0.3
	Height (m)	270	1.8	0.1	1.8	1.6	1.9	0	1	187	1.6	0	1.6	1.5	1.7	0.1	1
	WC (cm)	269	107.7	12.2	106	79	150	0.9	0.2	187	101.1	14.9	101.5	67	145	0.9	0.1
	Hip (cm)	270	104.6	9	103	84.5	145	0.9	0.3	187	109.1	11.6	108	85	152	0.9	0.2
	WHR	269	1	0.1	1	0.8	1.2	0.5	0.1	187	0.9	0.1	0.9	0.7	1.1	0.5	0
D2D2007 controls	Age (yrs)	1014	59.6	8.4	60	45	74	0	-0.3	1217	58.8	8.2	58	45	74	0.1	-0.3
	BMI (kg/m²)	1014	26.8	3.7	26.5	16.5	48.9	1	0	1217	27	4.9	26.3	17.2	61.3	1	-0.1
	Weight (kg)	1014	83.1	13.3	81.5	46.5	160	0.8	0.5	1217	71.5	13.5	69.8	41.9	158.6	0.9	0.3
	Height (m)	1014	1.8	0.1	1.8	1.4	2	0	1	1217	1.6	0.1	1.6	1.4	1.8	-0.1	1
	WC (cm)	1014	98.1	10.9	97	63	149	0.9	0.1	1215	88.9	12.2	87.5	62	150	0.9	0
	Hip (cm)	1014	99.6	6.8	99	79	141	0.8	0.3	1215	102.2	9.4	101	79.5	150	0.9	0.1
	WHR	1014	1	0.1	1	0.8	1.2	0.7	-0.1	1214	0.9	0.1	0.9	0.7	1.2	0.6	0
DILGOM	Age (yrs)	1797	53.3	13.5	55	25	74	0.2	-0.3	2139	51.7	13.6	53	25	74	0.2	-0.4
	BMI (kg/m²)	1791	27.2	4.2	26.7	15.8	63.1	1	-0.1	2139	26.9	5.4	25.8	16	52.5	1	-0.2
	Weight (kg)	1791	84	14.1	82.2	50.1	192.6	0.9	0.4	2139	70.8	14.2	68.5	38.5	144.5	0.9	0.2
	Height (m)	1797	1.8	0.1	1.8	1.5	2	-0.1	1	2138	1.6	0.1	1.6	1.4	1.8	-0.2	1
	WC (cm)	1787	96.8	12	95.5	64	172	0.9	0.1	2122	87	13.5	85	58	143	0.9	0
	Hip (cm)	1790	100.5	7.6	100	80.5	161	0.9	0.3	2122	102	10.8	100.5	75.5	162	0.9	0
	WHR	1784	1	0.1	1	0.8	1.2	0.6	-0.2	2116	0.9	0.1	0.8	0.7	1.1	0.6	-0.1
DPS cases	Age (yrs)	32	56	6.7	58.6	43.7	64.8	-0.1	-0.2	57	54.9	6.2	54.9	43.3	67.8	-0.1	-0.2
	BMI (kg/m²)	32	30.6	3.1	31.5	24.4	37.8	1	-0.1	57	32.9	4.4	32.2	25.6	45.8	1	-0.3
	Weight (kg)	32	94	11.4	90	78.2	122.5	0.9	0.3	57	87.4	12.5	86.6	67	136.5	0.8	0.3
	Height (m)	32	1.8	0.1	1.8	1.7	1.9	-0.1	1	57	1.6	0.1	1.6	1.5	1.8	-0.3	1
	WC (cm)	32	107.2	9.2	105.5	88.3	127	0.8	0.2	57	103	10.3	102.5	82.3	126	0.7	0.1
	Hip (cm)	32	106.2	6.5	105.2	97	119	0.8	0.2	57	114	8.6	113.6	99	140	0.8	0.1
	WHR	32	1	0	1	0.9	1.1	0.3	0	57	0.9	0.1	0.9	0.8	1	0.3	0
DPS controls	Age (yrs)	116	56.4	7.1	59	41	65.9	0.1	-0.3	267	55	7.3	56.9	40.1	67.9	-0.2	-0.2
	BMI (kg/m²)	116	29.5	3.5	29.1	23.5	44.8	1	0	267	31.7	4.8	30.6	24	50.5	1	0.1
	Weight (kg)	116	90.6	12.4	89	62.9	148.1	0.8	0.5	267	83	14.3	80	52.9	131.1	0.9	0.5
	Height (m)	116	1.8	0.1	1.8	1.6	1.9	0	1	267	1.6	0.1	1.6	1.4	1.8	0.1	1
	WC (cm)	116	103.1	9.3	102.3	83.5	139	0.8	0.2	265	99.3	11.3	98	78	139	0.8	0.2
	Hip (cm)	116	104.9	7.6	104.7	88	143.5	0.8	0.3	267	112.1	10.8	110	90.3	161	0.9	0.2
	WHR	116	1	0	1	0.9	1.1	0.4	0	265	0.9	0.1	0.9	0.7	1.1	0.2	0.1
DR'S EXTRA Controls	Age (yrs)	542	66.4	5.4	66.1	57.4	78.5	-0.1	-0.3	632	66.4	5.2	66.2	57.7	78.7	0	-0.3
	BMI (kg/m²)	542	27.1	3.5	26.8	19.3	44.2	1	0.1	632	27.2	4.6	26.3	16	48.6	1	-0.1
	Weight (kg)	542	82.1	12.4	80.8	51.3	135.9	0.9	0.5	632	69.5	12.2	67.9	41.9	143.2	0.9	0.3
	Height (m)	542	1.7	0.1	1.7	1.6	1.9	0.1	1	632	1.6	0.1	1.6	1.4	1.8	-0.1	1
	WC (cm)	542	97.5	10.1	96.6	73	136.5	0.9	0.3	632	87.4	12	86.3	59.5	130.5	0.9	0
	Hip (cm)	542	98.9	7.2	99	78	134	0.8	0.4	632	101.2	9.4	99.8	78.5	139.5	0.9	0.1
	WHR	542	1	0.1	1	0.8	1.1	0.6	0	632	0.9	0.1	0.9	0.7	1	0.6	-0.1
DR'S EXTRA Cases	Age (yrs)	60	69.1	5.9	70.8	57.8	78.1	-0.2	-0.4	61	68.3	5.7	69.7	57.9	77.7	0	-0.4
	BMI (kg/m²)	60	29.4	4.8	28.7	21	41.2	1	0.2	61	32.4	6.1	31.7	20	48.4	1	-0.1
	Weight (kg)	60	86.7	16.4	83.7	47.6	120.5	0.9	0.5	61	81.8	16.2	80.6	54.1	129.9	0.9	0.2
	Height (m)	60	1.7	0.1	1.7	1.5	2	0.2	1	61	1.6	0.1	1.6	1.4	1.7	-0.1	1
	WC (cm)	60	104.4	12.8	104.3	80	133.8	0.9	0.3	61	103.3	14.4	101.8	72	136.5	0.9	0
	Hip (cm)	60	103.3	10.4	101	81	132.5	0.9	0.4	61	110.3	11.5	109	91	145	0.9	0
	WHR	60	1	0.1	1	0.9	1.1	0.5	0	61	0.9	0.1	0.9	0.8	1.2	0.5	0
EAS	Age (yrs)	352	64.7	5.6	64.8	54.7	75.4	0	-0.2	377	64.2	5.7	63.9	54.9	75.2	0	-0.2
	BMI (kg/m²)	352	25.3	3.1	25.2	16.7	39.6	1	-0.1	377	25.3	4.2	24.6	17.4	51.5	1	-0.1
	Weight (kg)	352	75	10.6	74.3	48.8	123.9	0.8	0.5	377	64.4	11.4	63.1	38.9	118.9	0.9	0.4
	Height (m)	352	1.7	0.1	1.7	1.5	1.9	-0.1	1	377	1.6	0.1	1.6	1.4	1.8	-0.1	1
	WC (cm)	-	-	-	-	-	-	-	-	-	-	-	-	-	-	-	-
	Hip (cm)	-	-	-	-	-	-	-	-	-	-	-	-	-	-	-	-
	WHR	-	-	-	-	-	-	-	-	-	-	-	-	-	-	-	-
EGCUT metaboc CAD cases	Age (yrs)	355	63.5	10.2	64	36	94	-0.2	-0.3	613	64.5	10.5	64	32	93	-0.3	-0.3
	BMI (kg/m²)	354	32.6	4.7	31.9	20.5	51.4	1	0	613	33.7	5.7	32.9	21.2	56.9	1	0
	Weight (kg)	354	100.8	16.1	99	62	160	0.9	0.4	613	88.3	16.3	86	47	160	0.9	0.4
	Height (m)	355	1.8	0.1	1.8	1.6	2	0	1	613	1.6	0.1	1.6	1.4	1.8	0	1
	WC (cm)	272	111.7	11.2	110.5	82	145	0.8	0.1	417	104.6	14.2	103	62	150	0.8	0.3
	Hip (cm)	272	110.1	11.2	110	70	155	0.6	0.1	417	116	14	115	63	165	0.8	0.3
	WHR	272	1	0.1	1	0.7	1.6	0.2	-0.1	417	0.9	0.1	0.9	0.7	1.1	0.2	0
EGCUT metaboc controls	Age (yrs)	341	54.4	11	55	35	86	0.2	-0.3	601	50	10.1	49	34	93	0.2	-0.3
	BMI (kg/m²)	340	22.8	2.5	22.7	16.7	29.4	1	-0.2	600	22.1	2.5	22.1	14.6	35.5	1	-0.1
	Weight (kg)	340	70.9	8.5	70	48	95	0.8	0.5	600	59.5	7.6	60	41	99	0.8	0.5
	Height (m)	340	1.8	0.1	1.8	1.5	2	-0.2	1	600	1.6	0.1	1.6	1.4	1.8	-0.1	1
	WC (cm)	340	84.1	6.8	85	54	110	0.5	0.2	600	72.8	5.8	73	52	105	0.7	0.1
	Hip (cm)	340	94.9	7.7	96	57	115	0.4	0.2	600	95.1	7.2	95	64	122	0.6	0.3
	WHR	340	0.9	0.1	0.9	0.7	1.2	0.1	0	600	0.8	0.1	0.8	0.6	1.2	0.2	-0.1
EGCUT metaboc DB cases	Age (yrs)	355	63.5	10.2	64	36	94	-0.2	-0.3	613	64.5	10.5	64	32	93	-0.3	-0.3
	BMI (kg/m²)	354	32.6	4.7	31.9	20.5	51.4	1	0	613	33.7	5.7	32.9	21.2	56.9	1	0
	Weight (kg)	354	100.8	16.1	99	62	160	0.9	0.4	613	88.3	16.3	86	47	160	0.9	0.4
	Height (m)	355	1.8	0.1	1.8	1.6	2	0	1	613	1.6	0.1	1.6	1.4	1.8	0	1
	WC (cm)	272	111.7	11.2	110.5	82	145	0.8	0.1	417	104.6	14.2	103	62	150	0.8	0.3
	Hip (cm)	272	110.1	11.2	110	70	155	0.6	0.1	417	116	14	115	63	165	0.8	0.3
	WHR	272	1	0.1	1	0.7	1.6	0.2	-0.1	417	0.9	0.1	0.9	0.7	1.1	0.2	0
ELY	Age (yrs)	744	61.5	9.1	61.5	35.7	77.4	0	-0.3	857	60.8	9.2	60.2	36.3	78.9	0.1	-0.3
	BMI (kg/m²)	744	27.4	4	26.8	16	45.8	1	0	855	27.3	5.4	26.3	16.9	59.3	1	-0.1
	Height (m)	744	1.7	0.1	1.7	1.6	2	0	1	855	1.6	0.1	1.6	1.5	1.8	-0.1	1
	Hip (cm)	736	105.3	7.6	104.5	85.2	139.3	0.8	0.3	852	107.1	11.8	105.3	80.1	171	0.9	0.1
	WC (cm)	736	100	10.6	99.4	71.3	144	0.8	0.1	853	87.6	12.6	85.9	57.3	143.3	0.8	0
	Weight (kg)	744	83.1	13.3	81	48.5	134.5	0.9	0.4	856	71.1	14.3	68.5	38	145	0.9	0.3
	WHR	735	0.9	0.1	0.9	0.8	1.1	0.5	-0.1	852	0.8	0.1	0.8	0.6	1	0.3	-0.1
EPIC Cases	Age (yrs)	432	61.5	8.1	62	41	77	0	-0.2	295	62.1	8.3	63	41	77	-0.2	-0.2
	BMI (kg/m²)	432	29.1	3.8	28.6	19.6	49.1	1	0	291	30.1	5.1	29.8	19.5	45.5	1	0.1
	Height (m)	432	1.7	0.1	1.7	1.5	1.9	0	1	294	1.6	0.1	1.6	1.4	1.8	0.1	1
	Hip (cm)	432	106.6	7.4	105.8	88.8	141.9	0.8	0.3	295	110	11.4	108.6	85	151.6	0.9	0.3
	WC (cm)	432	103.5	10	103	79	145.6	0.8	0.2	295	92.8	12.5	92	64.4	141.3	0.9	0.2
	Weight (kg)	432	87.6	12.9	86.2	56	160	0.8	0.5	292	77.1	14.6	75	45.8	124.4	0.9	0.4
	WHR	432	1	0.1	1	0.8	1.1	0.4	0	295	0.8	0.1	0.8	0.7	1.2	0.3	0
EPIC Controls	Age (yrs)	411	59.4	9.2	60	40	79	0.1	-0.2	552	58.4	9.6	58	39	77	0.2	-0.3
	BMI (kg/m²)	410	26.4	3.3	26.1	16.9	40.3	1	-0.1	551	25.9	4	25.3	16.3	46	1	-0.1
	Height (m)	410	1.7	0.1	1.7	1.5	2	-0.1	1	552	1.6	0.1	1.6	1.4	1.8	-0.1	1
	Hip (cm)	410	102.5	6.3	102.3	83.2	125.3	0.8	0.3	549	102.7	8.6	101.5	81.6	153.8	0.8	0.2
	WC (cm)	411	94.9	9.7	94.4	71.8	134	0.8	0.1	550	81.5	10.3	79.9	56.5	122.1	0.8	0
	Weight (kg)	411	79.8	11.3	78.4	51	135	0.8	0.5	551	67.2	11.2	65.4	41.2	126.6	0.9	0.4
	WHR	410	0.9	0.1	0.9	0.8	1.2	0.6	-0.1	549	0.8	0.1	0.8	0.6	1	0.5	-0.1
Fenland	Age (yrs)	1488	46.9	7.2	46.7	30.9	59.9	0.1	-0.1	1698	46.9	7	47.1	30.5	60	0.2	-0.1
	BMI (kg/m²)	1486	27	4.1	26.5	16.4	50.6	1	-0.1	1698	26.5	5.5	25.4	16.9	59.9	1	-0.1
	Body fat percentage (%)	1465	23.7	5.7	23.8	5.4	42.8	0.8	-0.1	1667	35.7	7.2	35.6	12.8	57.7	0.9	0.1
	Height (m)	1486	1.8	0.1	1.8	1.6	2	-0.1	1	1698	1.6	0.1	1.6	1.4	1.9	-0.1	1
	Hip (cm)	1485	103.2	7.2	102.5	83.4	155	0.8	0.3	1698	103.6	11	101.7	78.7	180.4	0.9	0.2
	WC (cm)	1485	96.4	11.2	95.3	65.6	149	0.9	0.1	1698	85.2	12.8	82.8	59	144.3	0.9	0.1
	Weight (kg)	1486	85.4	14.1	83.4	52	177.6	0.9	0.4	1698	71.2	15.5	67.9	41.5	181	0.9	0.3
	WHR	1484	0.9	0.1	0.9	0.8	1.2	0.7	-0.1	1698	0.8	0.1	0.8	0.5	1.2	0.5	-0.1
FUSION2 cases	Age (yrs)	585	58.5	9.1	59	28	82	-0.1	-0.1	454	61.1	8	61	34.4	89	-0.1	-0.2
	BMI (kg/m²)	585	30.2	5	29.7	19.7	53	1	0	454	31.7	5.8	31	17.8	53.5	1	0
	Weight (kg)	585	92.3	17.2	89.9	42.2	165	0.9	0.4	454	81.5	16	79.1	48	137.2	0.9	0.4
	Height (m)	585	1.7	0.1	1.8	1.4	2	0	1	454	1.6	0.1	1.6	1.5	1.8	0	1
	WC (cm)	585	105.5	13.2	104	73	149	0.9	0.2	452	99.2	13.8	98.5	62	142.5	0.9	0.2
	Hip (cm)	585	106.2	9.6	105	74	164	0.9	0.3	452	110.9	11.8	109	84	147.5	0.9	0.2
	WHR	585	1	0.1	1	0.7	1.2	0.6	0	452	0.9	0.1	0.9	0.6	1.2	0.3	0.1
FUSION2 controls	Age (yrs)	1043	55.6	7.9	56	41.3	74.8	0	-0.1	847	56.7	8.3	57	41	74.7	0.3	-0.3
	BMI (kg/m²)	1043	26.5	3.5	26.2	15.8	39.2	1	0	847	26.6	4.6	25.8	17.2	57.2	1	-0.2
	Weight (kg)	1043	81.1	12.6	80	46.5	130	0.9	0.5	847	69	12.2	67	43.2	153.8	0.9	0.3
	Height (m)	1043	1.7	0.1	1.7	1.5	2	0	1	847	1.6	0.1	1.6	1.4	1.8	-0.2	1
	WC (cm)	1040	94.9	10.1	94	68	155	0.8	0.2	843	85	11.3	83.5	58	128	0.8	0
	Hip (cm)	1040	100.4	6.6	100	76	129	0.8	0.3	843	101.7	8.6	101	72	140	0.9	0.1
	WHR	1040	0.9	0.1	0.9	0.8	1.9	0.6	0.1	843	0.8	0.1	0.8	0.7	1.3	0.5	-0.1
GLACIER	Age (yrs)	2381	50.1	8.3	50	30	62	0.1	-0.2	3666	49.3	8.8	50	29	64	0.2	-0.2
	BMI (kg/m²)	2381	26.1	3.4	25.8	17.8	59	1	-0.2	3666	25.5	4.4	24.8	16	57.9	1	-0.2
	Weight (kg)	2381	81.7	11.4	80.9	51	135	0.8	0.4	3666	68.6	11.7	67	40	146	0.9	0.3
	Height (m)	2381	1.8	0.1	1.8	1.5	2.1	-0.2	1	3666	1.6	0.1	1.6	1.2	1.9	-0.2	1
	WC (cm)	874	97	10.1	96	71	156	0.8	0.1	1445	86.7	11.7	85	59	131	0.9	0.1
	Hip (cm)	-	-	-	-	-	-	-	-	-	-	-	-	-	-	-	-
	WHR	-	-	-	-	-	-	-	-	-	-	-	-	-	-	-	-
GO-DARTS cases	Age (yrs)	1929	63.2	9.5	64	36	88	-0.26	-0.18	1351	64	9.8	66	36	89	-0.33	-0.18
	BMI (kg/m²)	1924	31.1	5.6	30.3	16.2	61.5	1	-0.06	1346	32.9	7.1	32	16.4	62.3	1	0
	Weight (kg)	1925	94.3	18.2	91.7	46.9	177.8	0.91	0.35	1347	84.6	19.3	82.6	42.2	164	0.94	0.35
	Height (m)	1928	1.74	0.07	1.74	1.5	2	-0.06	1	1348	1.6	0.06	1.6	1.4	1.86	0	1
	WC (cm)	1750	108.5	13.4	107	74	164	0.89	0.13	1215	103.7	15.2	103	62	177	0.84	0.16
	Hip (cm)	-	-	-	-	-	-	-	-	-	-	-	-	-	-	-	-
	WHR	-	-	-	-	-	-	-	-	-	-	-	-	-	-	-	-
GO-DARTS controls	Age (yrs)	1918	60.2	11.1	61	36	79	0.01	-0.26	1789	58	11.4	57	36	79	0.01	-0.24
	BMI (kg/m²)	1918	27.3	4	26.9	16.2	54.9	1	-0.08	1788	26.8	5	26	14.3	51.6	1	-0.15
	Weight (kg)	1918	84.6	13.3	83.8	46.9	168	0.88	0.4	1788	70.5	13.5	68.6	33	125.6	0.91	0.27
	Height (m)	1918	1.76	0.07	1.76	1.51	1.98	-0.08	1	1789	1.62	0.07	1.62	1.43	1.85	-0.15	1
	WC (cm)	1917	98.5	10.7	98	69	172	0.86	0.11	1787	86.7	12.3	86	61	153	0.84	0.02
	Hip (cm)	-	-	-	-	-	-	-	-	-	-	-	-	-	-	-	-
	WHR	-	-	-	-	-	-	-	-	-	-	-	-	-	-	-	-
Heinz Nixdorf Recall Study	Age (yrs)	2261	59.6	7.8	60	45	76	0.1	-0.3	2256	59.6	7.8	60	45	76	0.1	-0.2
	BMI (kg/m²)	2250	28	4.9	27.6	18.1	49.4	1	-0.1	2242	27.4	5.9	26.9	16.5	59.2	1	-0.2
	Weight (kg)	2252	85.7	14.8	84.5	53.5	150	0.9	0.4	2242	72	15.2	70.8	43.3	150	0.9	0.2
	Height (m)	2256	1.7	0.6	1.8	1.5	2	-0.1	1	2244	1.6	0.8	1.6	1.4	1.8	-0.2	1
	WC (cm)	2256	100	12.5	99.3	48.6	172	0.9	0.1	2246	88	14.4	87.2	46	144.7	0.9	0
	Hip (cm)	2256	102	10.5	101.3	77.7	160.4	0.8	0.2	2245	103.6	13.9	103	57	160.6	0.9	0.1
	WHR	2255	0.9	0.6	1	0.5	1.2	0.4	-0.1	2245	0.8	0.7	0.9	0.5	1.3	0.4	-0.1
HUNT cases	Age (yrs)	299	67.3	11.3	70	27	90	-0.2	-0.2	279	70.7	11.2	73	27	92	-0.2	-0.3
	BMI (kg/m²)	299	28.1	3.7	27.9	19.4	45.6	1	0	279	30.3	5.2	30	18.4	47.1	1	-0.1
	Weight (kg)	299	85.8	12.9	85	54.5	135	0.9	0.4	279	77	13.9	77	42.5	120	0.9	0.3
	Height (m)	299	1.7	0.1	1.8	1.6	1.9	0	1	279	1.6	0.1	1.6	1.4	1.8	-0.1	1
	WC (cm)	297	98.8	9.5	99	77	133	0.8	0.1	273	94.5	12.2	94	60	130	0.9	0
	Hip (cm)	297	104.4	6.6	104	88	131	0.7	0.3	273	109.5	10.9	108	83	150	0.8	0
	WHR	297	0.9	0.1	0.9	0.8	1.2	0.5	-0.1	273	0.9	0.1	0.9	0.7	1.1	0.4	0
HUNT controls	Age (yrs)	394	63.9	14.5	68	20	90	0	-0.4	362	67.6	13.9	71	20	92	0	-0.5
	BMI (kg/m²)	394	26.5	3.3	26.3	17.8	39.3	1	0	362	27.6	4.5	27.3	17.5	42	1	0
	Weight (kg)	394	80.5	11.6	79.7	52	131.5	0.8	0.5	362	71.1	12.4	70.5	42	112	0.9	0.4
	Height (m)	394	1.7	0.1	1.7	1.5	1.9	0	1	362	1.6	0.1	1.6	1.4	1.8	0	1
	WC (cm)	394	93.5	8.7	94	70	121	0.8	0.1	359	86.7	11	86	63	117	0.8	0
	Hip (cm)	394	102	5.6	102	85	123	0.7	0.2	358	104.5	9.7	104	84	134	0.9	0.1
	WHR	394	0.9	0.1	0.9	0.8	1.1	0.5	0	358	0.8	0.1	0.8	0.7	1.1	0.4	-0.1
IMPROVE	Age (yrs)	1666	64	5.3	64.5	54.5	79.5	-0.1	0	1783	64.4	5.5	64.6	54.5	79.8	0	0
	BMI (kg/m²)	1665	27.4	3.6	27.1	18.9	47.2	1	0.1	1783	27.1	4.8	26.5	15.9	47.5	1	0.1
	Weight (kg)	1665	83.5	13.2	82	51.4	160	0.8	0.6	1783	70.3	14.1	68.4	39	131	0.9	0.4
	Height (m)	1665	1.7	0.1	1.7	1.5	2	0.1	1	1783	1.6	0.1	1.6	1.4	1.8	0.1	1
	WC (cm)	1664	98.7	10.8	98	64	150	0.8	0.3	1775	89.6	12.5	89	54	145	0.8	0.2
	Hip (cm)	1664	101.7	8.1	101	73	155	0.5	0	1775	102.8	10.8	102	67	160	0.3	0
	WHR	1664	1	0.1	1	0.7	1.5	0.7	0.4	1775	0.9	0.1	0.9	0.6	1.3	0.8	0.3
KORA S3 (noGWA)	Age (yrs)	604	40.9	13.3	37	25	74	0.2	-0.4	674	40.9	12.7	38	25	74	0.3	-0.4
	BMI (kg/m²)	599	26.5	3.4	26.2	18	41	1	-0.1	659	25.2	4.7	24.1	16.9	41	1	-0.2
	Weight (kg)	599	82.4	11.6	81	52.3	132	0.8	0.4	659	66.7	12.2	64.2	43.6	132	0.9	0.2
	Height (m)	603	1.8	0.1	1.8	1.6	2	-0.1	1	671	1.6	0.1	1.6	1.4	2	-0.2	1
	WC (cm)	603	92.8	9.3	92	70.5	127	0.9	0	660	79.2	11.4	76.5	59	127	0.9	-0.1
	Hip (cm)	603	102.9	6.2	102.5	86	125	0.8	0.3	660	101.3	9.6	100	79	125	0.9	0
	WHR	603	0.9	0.1	0.9	0.8	1.1	0.6	-0.2	660	0.8	0.1	0.8	0.6	1.1	0.5	-0.3
KORA S4 (noGWA)	Age (yrs)	585	42.7	15.8	36	24	75	0.3	-0.5	637	41.2	14.8	36	24	75	0.3	-0.5
	BMI (kg/m²)	582	26.6	3.6	26.4	16.3	41.8	1	-0.2	624	25.9	5.1	25.3	15.8	41.8	1	-0.2
	Weight (kg)	582	82.7	11.7	81.5	52.3	136.5	0.8	0.4	624	68.9	13.4	67.2	41.1	136.5	0.9	0.2
	Height (m)	585	1.8	0.1	1.8	1.6	2	-0.2	1	632	1.6	0.1	1.6	1.4	2	-0.2	1
	WC (cm)	585	94.4	10	93.5	65.4	134.2	0.9	-0.1	624	82.2	12	80.6	61	134.2	0.9	-0.1
	Hip (cm)	585	104.2	6.4	103.8	87.2	136.1	0.8	0.2	624	103.9	10	102.8	81.9	136.1	0.9	0
	WHR	585	0.9	0.1	0.9	0.7	1.1	0.6	-0.4	624	0.8	0.1	0.8	0.6	1.1	0.5	-0.3
LURIC cases	Age (yrs)	1678	63.1	9.8	63.8	26.9	88.5	-0.1	-0.2	573	66.2	9.6	67.2	34.2	92.1	-0.4	-0.1
	BMI (kg/m²)	1678	27.5	3.8	27.1	17.5	57.1	1	-0.1	573	27.2	4.6	27	16.4	46.1	1	-0.1
	Weight (kg)	1678	82.7	12.7	81.8	51	185	0.9	0.4	573	70.5	12.9	70	43	122.3	0.9	0.4
	Height (m)	1678	1.7	0.1	1.7	1.5	2	-0.1	1	573	1.6	0.1	1.6	1.5	1.8	-0.1	1
	WC (cm)	1652	101	10.7	100	61	165	0.8	0.1	566	94.9	13.3	94	63	135	0.8	0.1
	Hip (cm)	1652	102.5	8.9	102	66	165	0.7	0.2	566	103.8	11.5	103	70	150	0.8	0.2
	WHR	1652	1	0.1	1	0.6	1.6	0.3	-0.1	566	0.9	0.1	0.9	0.7	1.2	0.3	0
LURIC controls	Age (yrs)	329	55	12.3	55.6	18.6	87.9	0.1	-0.3	315	62.1	11	62.7	27	90.7	0	-0.2
	BMI (kg/m²)	329	27.3	3.7	26.7	16.3	40.3	1	-0.1	315	27.3	4.9	26.5	16.8	44.8	1	-0.1
	Weight (kg)	329	85	12.6	83	54.8	130	0.8	0.4	315	71.9	13.4	70	41	125	0.9	0.3
	Height (m)	329	1.8	0.1	1.8	1.6	2	-0.1	1	315	1.6	0.1	1.6	1.4	1.9	-0.1	1
	WC (cm)	326	99.4	10.6	98	68	139	0.8	0	310	92.9	12.4	93	58	134	0.8	0.1
	Hip (cm)	326	102.2	8.3	101.5	75	138	0.7	0.1	310	104	11.7	103	71	147	0.8	0.1
	WHR	326	1	0.1	1	0.7	1.2	0.4	-0.1	310	0.9	0.1	0.9	0.7	1.2	0.2	0
MORGAM	Age (yrs)	2172	59.5	8	59.9	25.1	76.4	0	-0.1	356	57.8	9.1	59.1	27.3	73.8	0.2	-0.2
	BMI (kg/m²)	2169	26.9	4	26.5	16.7	51.9	1	0	353	27.6	4.9	26.8	15.4	51.1	1	-0.1
	Weight (kg)	2169	80.6	13.3	79.6	42.8	154	0.9	0.4	354	69.8	13.6	68.1	40.2	134	0.9	0.4
	Height (m)	2168	1.7	0.1	1.7	1.5	1.9	0	1	353	1.6	0.1	1.6	1.4	1.8	-0.1	1
	WC (cm)	1158	95.3	11	94.5	64	144	0.9	0.1	321	85.3	12.3	84	60.5	121	0.9	0.1
	Hip (cm)	1158	100.7	7.6	100	74.5	144	0.8	0.3	321	103.5	9.4	102	81.5	144	0.9	0.2
	WHR	1158	0.9	0.1	1	0.7	1.2	0.6	-0.1	321	0.8	0.1	0.8	0.7	1.1	0.6	-0.1
MORGAM cases	Age (yrs)	1780	58.8	7.8	58.6	25.5	75.8	0	-0.1	285	58.1	8.6	59.7	30.6	74.1	0.1	-0.3
	BMI (kg/m²)	1715	27.5	3.9	27.2	17	48	1	0	250	29.1	5.7	28.4	17.9	50.7	1	-0.3
	Weight (kg)	1716	81.7	12.8	80.6	50.2	129	0.9	0.4	250	72.7	14.1	71.4	46.9	132	0.9	0.1
	Height (m)	1715	1.7	0.1	1.7	1.5	2	0	1	250	1.6	0.1	1.6	1.4	1.8	-0.3	1
	WC (cm)	991	97.5	10.7	96.5	72	138.5	0.9	0.1	226	88.9	13.4	87.5	61.5	131	0.9	-0.1
	Hip (cm)	992	101	7.8	100	75	137	0.8	0.2	226	105.8	10.3	104.8	82.5	147.5	0.9	0
	WHR	991	1	0.1	1	0.7	1.2	0.5	0	226	0.8	0.1	0.8	0.6	1.4	0.4	-0.1
NSHD	Age (yrs)	466	53		53	53	53			522	53		53	53	53
	BMI (kg/m²)	464	27.6	4.2	27	18.2	43.1	1	-0.1	515	27.7	5.5	26.6	18.6	57.1	1	-0.1
	Height (m)	464	1.7	0.1	1.7	1.5	1.9	-0.1	1	520	1.6	0.1	1.6	1.4	1.8	-0.1	1
	Hip (cm)	463	103.8	7.1	103	89	143	0.8	0.3	519	106.2	10.9	105	75	148	0.9	0.1
	WC (cm)	463	98	10.8	97	74	135	0.8	0.1	519	86.8	13.3	85	63	159	0.9	0.1
	Weight (kg)	464	83.5	13.4	81.3	54.4	136.5	0.9	0.4	516	72	14.6	69.8	42.2	154	0.9	0.3
	WHR	463	0.9	0.1	0.9	0.8	1.1	0.6	0	518	0.8	0.1	0.8	0.6	1.1	0.4	0
PIVUS	Age (yrs)	490	70.1	0.2	70.1	69.8	72.3	0.1	-0.1	488	70.3	0.1	70.3	69.9	70.8	-0.1	0
	BMI (kg/m²)	490	27	3.7	26.9	17.7	43.4	1	0	488	27.1	4.9	26.5	16.6	49.8	1	-0.1
	Weight (kg)	490	83.7	13	82	53	138	0.9	0.4	488	71.3	13.2	71	42	126	0.9	0.3
	Height (m)	490	1.8	0.1	1.8	1.6	2	0	1	488	1.6	0.1	1.6	1.5	1.8	-0.1	1
	WC (cm)	485	94.9	10.4	95	64	134	0.9	0.1	483	87.7	11.6	87	60	134	0.9	0
	Hip (cm)	485	100.3	6.8	100	86	130	0.8	0.3	483	101.4	9.3	101	71	143	0.9	0.1
	WHR	485	0.9	0.1	0.9	0.6	1.2	0.6	-0.1	483	0.9	0.1	0.9	0.6	1.1	0.5	-0.1
SCARFSHEEP cases	Age (yrs)	956	56.7	7.2	57	28	70	-0.1	-0.2	332	59.6	7.5	60.5	39	70	-0.1	-0.3
	BMI (kg/m²)	945	26.7	3.5	26.4	18	40.3	1	0	331	26.7	4.9	26	16.8	44	1	0
	Weight (kg)	738	83.8	12.7	83	49	148	0.9	0.4	264	71	14.4	70	43	120	0.9	0.4
	Height (m)	737	1.8	0.1	1.8	1.6	2	0	1	264	1.6	0.1	1.6	1.4	1.8	0	1
	WC (cm)	949	98.4	9.5	98	76	132	0.8	0.2	329	89	13.2	88	60	134	0.8	0.1
	Hip (cm)	949	101.6	7.1	101	82	135	0.7	0.3	328	103.6	11.1	102.5	55	142	0.9	0.2
	WHR	956	1	0.1	1	0.8	1.2	0.5	0	331	0.9	0.1	0.9	0.6	1.1	0.3	0
SCARFSHEEP controls	Age (yrs)	1256	57.3	7	57	41	70	0	-0.2	532	60.5	7.1	61	41	70	0.1	-0.2
	BMI (kg/m²)	1252	25.8	3.4	25.3	16	42.3	1	-0.1	526	25.4	3.9	24.9	17.5	45.3	1	-0.1
	Weight (kg)	974	81.7	11.6	81	50.4	134	0.8	0.4	441	68.2	10.3	68	41	112	0.9	0.3
	Height (m)	974	1.8	0.1	1.8	1.6	2	-0.1	1	441	1.6	0.1	1.6	1.5	1.8	-0.1	1
	WC (cm)	1248	95.7	9.7	95	57	133	0.8	0.1	528	85.7	11.3	84	59	122	0.8	0.1
	Hip (cm)	1246	99.6	7.6	100	53	135	0.6	0.2	526	101	9.1	101	56	134	0.8	0
	WHR	1254	1	0.1	1	0.6	1.8	0.5	0	530	0.8	0.1	0.8	0.6	1.4	0.4	0.1
STR	Age (yrs)	1046	74.3	9	75.2	45.8	93	-0.1	-0.2	1384	76.1	9.7	78.2	39.8	103.8	-0.1	-0.2
	BMI (kg/m²)	838	25.1	3.4	24.8	14.5	38.6	1	-0.1	1378	25	4.2	24.5	14.1	46.1	1	0
	Weight (kg)	1043	76.7	11.7	76	45	132	0.8	0.5	1377	63.8	11.7	63	35	126	0.9	0.4
	Height (m)	808	1.7	0.1	1.7	1.5	2	-0.1	1	1377	1.6	0.1	1.6	1.4	1.8	0	1
	WC (cm)	563	96.6	9.4	96	71	130	0.8	0.1	780	85.5	10	84	61	131	0.8	0
	Hip (cm)	563	100.8	8	101	80	131	0.7	0.1	778	99.3	10	99	49	133	0.7	0.1
	WHR	563	1	0.1	1	0.8	1.2	0.4	0.1	778	0.9	0.1	0.9	0.6	1.6	0.2	0
T2D - WTCCCnon GWAS	Age (yrs)	626	56.3	10.2	57	20.8	87	-0.19	-0.11	448	56.4	11.1	57.9	19.4	80.1	-0.15	-0.11
	BMI (kg/m²)	624	31.2	5.6	30.4	16.8	60.3	1	0.04	445	33.8	7.6	33	18.7	59.6	1	-0.05
	Weight (kg)	624	96.6	19.2	95	57	190.5	0.92	0.42	445	88.2	20.9	84.7	43	165.5	0.94	0.3
	Height (m)	625	1.8	0.1	1.8	1.6	2.2	0.04	1	445	1.6	0.1	1.6	1.4	1.8	-0.05	1
	WC (cm)	606	1.1	0.1	1.1	0.8	2	0.87	0.19	431	1	0.2	1	0.6	1.5	0.86	0.09
	Hip (cm)	606	1.1	0.1	1.1	0.9	2.2	0.76	0.22	431	1.2	0.2	1.1	0.8	1.7	0.89	0.09
	WHR	604	1	0.1	1	0.8	1.3	0.48	0.05	431	0.9	0.1	0.9	0.7	1.2	0.14	0.01
THISEAS	Age (yrs)	867	58.2	12.7	58	24	89	-0.1	-0.4	628	61.3	13.8	64	25	91.9	0.3	-0.5
	BMI (kg/m²)	806	28.4	4.1	27.9	18.4	44	1	-0.1	604	28.6	5.2	28	17.7	49.6	1	-0.3
	Weight (kg)	806	85.3	13.7	84	48	140	0.8	0.5	604	71.9	13.5	71.2	5.5	161	0.9	0.3
	Height (m)	806	1.7	0.1	1.7	1.6	2	-0.1	1	604	1.6	0.1	1.6	1.3	1.8	-0.3	1
	WC (cm)	674	101.2	11.9	100	51	193	0.7	0.1	408	91.3	13.7	90	63.5	134	0.7	-0.1
	Hip (cm)	540	104	9	104	44	138	0.7	0.2	400	105.7	11.6	105	62.5	148	0.8	0
	WHR	540	1	0.1	1	0.5	1.9	0.3	0	400	0.9	0.1	0.9	0.4	1.2	0.3	-0.1
Tromsø cases	Age (yrs)	352	57.7	11.1	57	28	82	-0.3	-0.2	357	62.1	13.4	64	26	89	-0.2	-0.3
	BMI (kg/m²)	352	28.6	4	28.6	18.3	46.1	1	0	357	29.8	5.5	29.4	17.3	48	1	0
	Weight (kg)	352	87.8	14.7	87	52.9	144.4	0.8	0.5	357	76.7	15.4	75.6	38.4	129.1	0.9	0.4
	Height (m)	352	1.7	0.1	1.7	1.5	2	0	1	357	1.6	0.1	1.6	1.4	1.8	0	1
	WC (cm)	194	102.3	10.4	102	73	139.5	0.8	0.2	188	97.5	12.9	97	50	133.5	0.9	0
	Hip (cm)	194	105.8	7	105	87	125	0.8	0.3	188	111.5	11.5	110	83.5	149	0.9	0.1
	WHR	194	1	0.1	1	0.7	1.5	0.5	0.1	188	0.9	0.1	0.9	0.4	1.1	0.3	-0.1
Tromsø controls	Age (yrs)	354	57.9	11.2	57.5	28	82	0	-0.2	355	62	13.4	64	26	89	0.2	-0.4
	BMI (kg/m²)	354	25.8	3.3	25.8	18.3	39.9	1	0.1	355	26	4.2	25.4	16	44	1	-0.2
	Weight (kg)	354	79.7	12.3	79	50.9	132.2	0.9	0.5	355	67.9	11.1	67.1	36	108.9	0.9	0.3
	Height (m)	354	1.8	0.1	1.8	1.6	2	0.1	1	355	1.6	0.1	1.6	1.4	1.8	-0.2	1
	WC (cm)	168	94.3	9.9	93	75	121	0.9	0.3	183	85.3	10.6	84	62	130	0.8	0.1
	Hip (cm)	168	103	6.4	103	89	122	0.7	0.4	183	103.8	8.6	103	82	135	0.9	0.2
	WHR	168	0.9	0.1	0.9	0.8	1.1	0.7	0.1	183	0.8	0.1	0.8	0.7	1	0.5	-0.1
ULSAM	Age (yrs)	1116	71	0.6	71	69.4	74.1	-0.1	0	-	-	-	-	-	-	-	-
	BMI (kg/m²)	1112	26.3	3.4	25.9	16.7	46.3	1	-0.1	-	-	-	-	-	-	-	-
	Weight (kg)	1116	80.4	11.4	79.5	46	138.7	0.9	0.4	-	-	-	-	-	-	-	-
	Height (m)	1112	1.7	0.1	1.8	1.6	2	-0.1	1	-	-	-	-	-	-	-	-
	WC (cm)	1095	94.8	9.5	94	51	137	0.9	0.1	-	-	-	-	-	-	-	-
	Hip (cm)	1095	100.2	7.1	100	51	141	0.8	0.3	-	-	-	-	-	-	-	-
	WHR	1095	0.9	0.1	0.9	0.8	1.1	0.6	-0.1	-	-	-	-	-	-	-	-
WHITEHALL	Age (yrs)	2555	60.7	5.9	59.6	50.7	73.7	0	-0.1	822	61.1	6	60.6	50.5	73.3	0.1	-0.2
	BMI (kg/m²)	2548	26.6	3.7	26.3	17.9	48.7	1	-0.1	820	27.3	5.5	26.2	15.8	49	1	-0.1
	Height (m)	2550	1.8	0.1	1.8	1.4	2	-0.1	1	821	1.6	0.1	1.6	1.4	1.9	-0.1	1
	Hip (cm)	2554	99.9	6.6	99.4	76	156	0.8	0.3	820	102.5	10.8	101.1	73.2	142.2	0.9	0.1
	WC (cm)	2554	95.1	10.4	94.5	66.6	138	0.9	0.1	821	86.4	13.5	85.2	55.2	132.5	0.9	0
	Weight (kg)	2549	81.7	12.3	80.4	43	144.2	0.8	0.4	821	71	14.8	68.7	38.9	138.3	0.9	0.3
	WHR	2554	1	0.1	0.9	0.7	1.2	0.7	-0.1	820	0.8	0.1	0.8	0.7	1.1	0.6	-0.1
