# Supplementary material for: Sex-stratified Genome-wide Association Studies Including 270,000 Individuals Show Sexual Dimorphism in Genetic Loci for Anthropometric Traits
Source: PLoS Genet. 2013 Jun 6;9(6):e1003500. doi: 10.1371/journal.pgen.1003500 (PMC3674993; doi:10.1371/journal.pgen.1003500)
Supplement: Table S7 — No difference in any of the 7 associations between age groups. Age-stratified analyses results were conducted from 59 discovery and in silico follow-up studies for the seven identified SNPs. (XLS) [file pgen.1003500.s012.xls]

## Sheet: Sheet1
	WOMEN			MEN			Sex-diff		WOMEN		MEN
	≤ 50 yrs	> 50 yrs	Age-diff	≤ 50 yrs	> 50 yrs	Age-diff	≤ 50 yrs	> 50 yrs	≤ 50 yrs	> 50 yrs	≤ 50 yrs	> 50 yrs
SNP	Pa	Pa	Pb	Pa	Pa	Pb	Pc	Pc	N	N	N	N
rs6717858	7.55e-14	1.98e-16	0.513	0.631	0.25	0.262	6.22e-06	1.02e-09	29767	46547	20358	26972
rs2820443	2.85e-13	2.02e-18	0.941	0.972	0.05	0.185	1.81e-06	9.47e-05	30054	46564	20365	26999
rs1358980	1.12e-08	1.07e-11	0.812	0.218	0.544	0.583	0.00462	0.000101	28977	46561	19455	26969
rs11743303	1.28e-06	0.000272	0.176	0.34	0.581	0.283	0.017	0.00725	30764	49427	21371	27531
rs2371767	1.9e-06	1.44e-08	0.863	0.399	0.612	0.763	0.013	0.00167	27783	44761	19358	26041
rs10478424	0.00306	3.37e-05	0.741	0.507	0.514	0.354	0.015	0.04	28926	45814	19356	26039
rs4684854	0.000337	3.7e-07	0.686	0.369	0.217	0.135	0.00227	0.029	28929	45816	19356	26023
Footnotes:
a P-value for sex- and age-group specific association.
b P-value for difference between the two age-groups within each of the sexes.
c P-value for difference between the two sexes within each of the age-groups.
