# Supplementary material for: Sex-stratified Genome-wide Association Studies Including 270,000 Individuals Show Sexual Dimorphism in Genetic Loci for Anthropometric Traits
Source: PLoS Genet. 2013 Jun 6;9(6):e1003500. doi: 10.1371/journal.pgen.1003500 (PMC3674993; doi:10.1371/journal.pgen.1003500)
Supplement: Table S8 — Sex-specific association of the 7 SNPs with other traits.(A) BMI, height and weight: From the joint discovery and follow-up including 122,907 men and 147,746 women for height, 97,482 and 97,062 for weight, and 120,975 and 142,332 for BMI. It should be noted that results in Table 1 and Table S7 are only for the phenotype and sex for which the SNP was selected. (B) hip circumference (HIP), waist circumference (WC), waist-hip-ratio (WHR): Including 75,102 men and 96,383 women for hip, 86,196 and 108,303 for waist circumference, and 76,838 and 98,747 for waist-hip-ratio. (C) hip circumference adjusted for BMI (HIPadjBMI), waist circumference adjusted for BMI (WCadjBMI), waist-hip-ratio adjusted for BMI (WHRadjBMI). Including 74,949 men and 96,353 women for HIPadjBMI, 86,036 and 108,052 for WCadjBMI, and 76,625 and 98,352 for WHRadjBMI. (D) lipid traits: From the Global Lipids Consortium (Teslovich et al., 2010) including 39,104 men and 64,235 women. (E) glycaemic traits: From the MAGIC consortium (Prokopenko et al., 2009) including 54,046 men and 60,450 women. (F) type 2 diabetes: From the DIAGRAM consortium (Zeggini et al., 2008) including 18,786 men (4,451 cases and 14,335 controls) and 28,332 women (3,680 cases and 24,652 controls). (G) Summary of enrichment statistics: for sex-specific association of the 7 SNPs with the metabolic traits. (XLS) [file pgen.1003500.s013.xls]

## Sheet: Sheet1
A.
		BMI				Height				Weight
		MEN		WOMEN		MEN		WOMEN		MEN		WOMEN
SNP	Gene	Effect	P	Effect	P	Effect	P	Effect	P	Effect	P	Effect	P
rs6717858	GRB14; COBLL1	-0.014	0.00189	-0.014	0.00101	-0.0066	0.142	-0.0011	0.785	-0.013	0.00749	-0.017	0.000701
rs2820443	LYPLAL; SLC30A10	-0.0049	0.303	-0.014	0.00231	-0.017	0.000602	-0.021	2.8e-06	-0.019	0.000515	-0.018	0.000946
rs1358980	VEGFA	-0.017	0.000315	-0.012	0.00601	-0.0088	0.065	-0.0074	0.103	-0.019	0.000265	-0.019	0.000717
rs11743303	MAP3K1	-0.0074	0.191	-0.0016	0.758	-0.0068	0.237	-0.0067	0.203	-0.0035	0.588	-0.0079	0.226
rs2371767	ADAMTS9	-0.015	0.00259	-0.016	0.000547	-0.0012	0.82	0.0065	0.163	-0.017	0.00324	-0.018	0.00168
rs10478424	HSD17B4	0.0094	0.168	-0.0048	0.43	-0.0021	0.755	-0.0011	0.858	0.0051	0.529	-0.0023	0.771
rs4684854	PPARG	-0.0006	0.886	0.0044	0.303	0.0085	0.068	-0.0019	0.658	0.0045	0.378	0.0037	0.483
B.
		HIP				WC				WHR
		MEN		WOMEN		MEN		WOMEN		MEN		WOMEN
SNP	Gene	Effect	P	Effect	P	Effect	P	Effect	P	Effect	P	Effect	P
rs6717858	GRB14; COBLL1	-0.021	0.00011	-0.025	7.84e-07	-0.02	6.72e-05	0.0096	0.037	-0.012	0.027	0.047	4.79e-23
rs2820443	LYPLAL; SLC30A10	-0.027	3.66e-06	-0.047	1.1e-17	-0.019	0.000548	-0.0004	0.942	0.0001	0.992	0.053	3.66e-24
rs1358980	VEGFA	-0.025	1.3e-05	-0.019	0.000782	-0.019	0.000339	0.017	0.000708	-0.002	0.716	0.05	1.78e-21
rs11743303	MAP3K1	-0.0081	0.248	0.0031	0.627	-0.0082	0.206	0.02	0.000884	-0.0068	0.314	0.032	1.08e-07
rs2371767	ADAMTS9	-0.025	4.24e-05	-0.018	0.00168	-0.02	0.000599	0.0064	0.221	-0.0027	0.651	0.043	8.53e-16
rs10478424	HSD17B4	0.0004	0.966	-0.016	0.025	0.0027	0.749	0.0068	0.321	0.0062	0.465	0.034	5.61e-07
rs4684854	PPARG	-0.016	0.00532	-0.015	0.00293	-0.011	0.028	0.012	0.016	-0.0001	0.986	0.034	5.24e-12
C.
		HIPadjBMI				WCadjBMI				WHRadjBMI
		MEN		WOMEN		MEN		WOMEN		MEN		WOMEN
SNP	Gene	Effect	P	Effect	P	Effect	P	Effect	P	Effect	P	Effect	P
rs6717858	GRB14; COBLL1	-0.011	0.042	-0.033	1.21e-11	-0.0092	0.02	0.029	1.65e-15	-0.0025	0.613	0.052	1.99e-29
rs2820443	LYPLAL; SLC30A10	-0.032	4.79e-08	-0.057	2.73e-27	-0.017	6.56e-05	0.021	2.51e-07	0.0048	0.374	0.064	4.62e-37
rs1358980	VEGFA	-0.016	0.00531	-0.017	0.0016	-0.0009	0.835	0.039	7.61e-22	0.01	0.048	0.06	2.41e-31
rs11743303	MAP3K1	-0.0009	0.901	0.0063	0.316	-0.0028	0.57	0.031	2.69e-11	-0.0004	0.947	0.036	6.85e-10
rs2371767	ADAMTS9	-0.016	0.01	-0.025	5.3e-06	0.0005	0.905	0.026	2.52e-10	0.015	0.00834	0.051	7.07e-23
rs10478424	HSD17B4	-0.0094	0.275	-0.017	0.015	-0.0017	0.76	0.019	0.00025	0.0023	0.761	0.039	3.45e-09
rs4684854	PPARG	-0.017	0.00298	-0.033	7.98e-11	-0.0082	0.042	0.014	0.000382	0.0042	0.411	0.037	4.17e-14
D.
		HDL-chol				LDL-chol				Total Cholesterol				Triglycerides
SNP	Gene	MEN		WOMEN		MEN		WOMEN		MEN		WOMEN		MEN		WOMEN
		Dir	P	Dir	P	Dir	P	Dir	P	Dir	P	Dir	P	Dir	P	Dir	P
rs6717858	GRB14; COBLL1	-	0.88	-	2.34e-06	+	0.106	+	0.017	+	0.032	+	0.0066	+	0.079	+	1.14e-05
rs2820443	LYPLAL; SLC30A10	-	0.975	-	0.081	+	0.099	+	0.288	+	0.057	+	0.237	+	0.863	+	0.107
rs1358980	VEGFA	-	1.53e-05	-	0.025	-	0.624	-	0.904	+	0.837	+	0.556	+	8.82e-07	+	0.019
rs11743303	MAP3K1	-	0.046	-	0.00729	+	0.365	+	0.042	+	0.286	+	0.00212	+	0.08	+	3.69e-05
rs2371767	ADAMTS9	+	0.44	-	0.35	-	0.348	+	0.465	+	0.596	+	0.704	+	0.213	+	0.371
rs10478424	HSD17B4	-	0.052	-	0.151	+	0.499	+	0.414	+	0.991	+	0.538	+	0.58	+	0.972
rs4684854	PPARG	-	0.283	-	0.365	+	0.00757	+	0.00845	+	0.000441	+	1.71e-05	+	0.00207	+	0.00862
E.
		Fasting Glucose				Fasting Insulin				HOMA-B				HOMA-IR
SNP	Gene	MEN		WOMEN		MEN		WOMEN		MEN		WOMEN		MEN		WOMEN
		Effect	P	Effect	P	Effect	P	Effect	P	Effect	P	Effect	P	Effect	P	Effect	P
rs6717858	GRB14; COBLL1	0.005	0.142	0.005	0.112	0.006	0.156	0.017	1.08e-05	0.004	0.456	0.013	0.035	0.002	0.826	0.014	0.067
rs2820443	LYPLAL; SLC30A10	0.004	0.304	0.005	0.129	0.014	0.00144	0.018	9.29e-06	0.01	0.101	0.017	0.013	0.012	0.121	0.019	0.018
rs1358980	VEGFA	0.002	0.474	0.004	0.278	0	0.982	0.007	0.083	-0.009	0.106	0.001	0.851	-0.015	0.024	-0.001	0.931
rs11743303	MAP3K1	-0.005	0.385	0.007	0.131	0.004	0.511	0.007	0.225	-0.012	0.782	0.048	0.186	0.048	0.281	0.077	0.063
rs2371767	ADAMTS9	0.003	0.456	0.007	0.046	-0.002	0.666	0.006	0.175	-0.006	0.386	0.006	0.395	-0.011	0.17	0.008	0.334
rs10478424	HSD17B4	-0.012	0.018	0.004	0.412	-0.005	0.385	0.002	0.786	NA	NA	NA	NA	NA	NA	NA	NA
rs4684854	PPARG	0.005	0.206	-0.001	0.746	-0.001	0.886	0.01	0.046	NA	NA	NA	NA	NA	NA	NA	NA
F.
		Type 2 Diabetes Associations
SNP	Gene	MEN		WOMEN
		OR	P	OR	P
rs6717858	GRB14; COBLL1	0.993	0.79	1.073	0.016
rs2820443	LYPLAL; SLC30A10	1.053	0.087	1.092	0.0057
rs1358980	VEGFA	1.061	0.099	1	1
rs11743303	MAP3K1	1.088	0.017	1.079	0.04
rs2371767	ADAMTS9	1.081	0.014	1.102	0.0032
rs10478424	HSD17B4	0.983	0.64	1	0.99
rs4684854	PPARG	1.033	0.27	1.019	0.55
G.
Trait	Number of SNPs tested	Number of SNPs in concordant direction a	P a	Number of SNPs in concordant direction with P<0.05 b	P b
HDL-Cholesterol	7	7	0.007813	3	0.0005071
LDL-Cholesterol	7	6	0.0625	3	0.0005071
Total Cholesterol	7	7	0.007813	3	0.0005071
Triglycerides	7	7	0.007813	4	1.29e-05
Fasting glucose	7	6	0.0625	1	0.1624
Fasting insulin	7	7	0.007813	3	0.0005071
HOMA-B	5	5	0.03125	2	0.005943
HOMA-IR	5	4	0.1875	1	0.1189
Type 2 Diabetes	7	7	0.007813	4	1.29e-05
Footnotes:
a Concordant direction is established if the allele that is associated with increased levels of the phenotype for which the SNP was selected (see Table 1) is associated with increased levels of these other phenotypes, except for HDL-cholesterol (decreasing); the corresponding binomial one-sided P-value is given testing whether the number of concordant SNPs is greater than expected by chance
b The number of SNPs with P<0.05 for the here stated phenotype, among the SNPs with concordant effect direction, and the binomial two-sided P-value.
