# Supplementary material for: Sex-stratified Genome-wide Association Studies Including 270,000 Individuals Show Sexual Dimorphism in Genetic Loci for Anthropometric Traits
Source: PLoS Genet. 2013 Jun 6;9(6):e1003500. doi: 10.1371/journal.pgen.1003500 (PMC3674993; doi:10.1371/journal.pgen.1003500)
Supplement: Table S11 — Gene expression in mice. Shown are expression levels in female and male mice, if expression was nominally significant in at least on sex, and the P-value testing for sex difference (P-diff<0.05) from the mouse experiments in three different center: (i) 21 male and 21 female mice with Illumina array for inguinal or gonadal fat (Houston, H), (ii) 139 male and 133 female mice with Illumina array for liver (Oxford, O), (iii) 7 male and 7 female mice with PCR analysis for brown fat, inguinal or gonadal fat, and liver (Regensburg, R). Examined genes are listed in Table S13. (XLS) [file pgen.1003500.s016.xls]

## Sheet: Sheet1
Locus	Gene	Center	Tissuea	Target	Expression in females (mean ± s.e.m.)	Expression in males (mean ± s.e.m.)	P for sex-differenceb
1	GRB14	H	Inguinal fat	1417673_at	551.97 ± 106.63	1,566.03 ± 49.78	0.046
1	GRB14	O	Liver	scl0003079.1_4-S	8.44 ± 0.0085	8.49 ± 0.0091	0.012
1	GRB14	R	Brown fat		0.09 ± 0.01	0.15 ± 0.01	0.001
1	GRB14	R	Inguinal fat		0.093 ± 0.01	0.043 ± 0.01	0.004
2	LYPLAL1	H	Gonadal fat	1451490_at	617.37 ± 39.56	475.99 ± 37.77	0.024
2	LYPLAL1	H	Inguinal fat	1451490_at	329.03 ± 45.33	288.10 ± 26.02	0.047
2	LYPLAL1	O	Liver	scl15797.5_597-S	8.34 ± 0.0146	8.26 ± 0.0139	0.00558
2	LYPLAL1	O	Liver	scl000982.1_2-S	7.75 ± 0.0049	7.73 ± 0.0049	0.049
2	LYPLAL1	R	Liver		0.52 ± 0.02	0.33 ± 0.03	0.002
2	SLC30A10	O	Liver	GI_38073697-S	7.88 ± 0.0049	7.91 ± 0.0055	0.022
3	VEGFA	H	Inguinal fat	1451959_a_at	61.76 ± 4.46	105.56 ± 6.77	1.61e-05
3	VEGFA	H	Gonadal fat	1420909_at	696.67 ± 50.75	486.79 ± 35.76	0.00631
3	VEGFA	R	Inguinal fat		0.84 ± 0.07	1.10 ± 0.09	0.038
4	MAP3K1	H	Gonadal fat	1424850_at	131.51 ± 4.98	170.27 ± 9.52	0.00564
4	MAP3K1	O	Liver	scl43508.21.1_5-S	9.27 ± 0.0121	9.22 ± 0.0109	0.038
5	ADAMTS9	H	Inguinal fat	1431399_at	68.36 ± 6.77	102.34 ± 6.96	0.00544
5	ADAMTS9	H	Gonadal fat	1430352_at	358.70 ± 6.52	279.57 ± 20.70	0.00787
5	ADAMTS9	H	Inguinal fat	1430352_at	224.57 ± 31.70	306.07 ± 27.42	0.028
5	ADAMTS9	R	Liver		0.03 ± 0.002	0.018 ± 0.003	0.007
5	ADAMTS9	R	Gonadal fat		0.84 ± 0.14	1.26 ± 0.06	0.017
5	ADAMTS9	R	Inguinal fat		0.41 ± 0.05	0.64 ± 0.07	0.026
5	PSMD6	H	Inguinal fat	1423696_a_at	1,384.27 ± 139.45	1,719.63 ± 52.19	0.015
5	PSMD6	H	Inguinal fat	1423697_at	1,194.53 ± 110.45	1,374.40 ± 59.79	0.035
5	PSMD6	H	Gonadal fat	1423697_at	1,519.93 ± 36.80	1,688.76 ± 59.16	0.036
6	FAM170A	O	Liver	GI_38083584-S	7.89 ± 0.0030	7.91 ± 0.0036	0.022
6	HSD17B4	H	Inguinal fat	1417369_at	2,149.23 ± 268.15	2,742.14 ± 164.74	0.033
6	HSD17B4	H	Inguinal fat	1455777_x_at	2,260.16 ± 299.06	2,799.51 ± 129.30	0.041
6	PRR16	O	Liver	ri|C130086K02|PX00172C15|AK081911|1925-S	7.86 ± 0.0030	7.88 ± 0.0036	0.027
7	MKRN2	O	Liver	scl29606.9_357-S	8.62 ± 0.0079	8.56 ± 0.0085	0.000288
7	PPARG	H	Gonadal fat	1420715_a_at	1,441.21 ± 127.58	1,023.71 ± 49.18	0.016
7	PPARG	O	Liver	scl29611.11.1_50-S	8.02 ± 0.0103	7.95 ± 0.0091	0.00163
7	PPARG	R	Liver		0.07 ± 0.08	0.04 ± 0.01	0.011
Footnotes:
a inguinal fat in mice relates to subcutaneous fat in humans; gonadal fat relates to visceral adipose fat
b P-values < 0.003 (=0.05/19) are considered significant (printed in bold) accounting for the 7 independent loci tested in Oxford and in Houston and the 5 loci tested in Regensburg (5+7+7=19)
s.e.m. = standard error of the mean,
